# Supplementary material for: Modeling the Effect of Temperature on the Severity of Blueberry Stem Blight and Dieback with a Focus on Neofusicoccum parvum and Cultivar Susceptibility
Source: MDPI journal article supplement (doi:10.3390/horticulturae10040363), 2024-04-05
Supplement: s1 [file s1]

Archive with 1 entries (1 files):
- horticulturae-2937535-supplementary.pdf
